# Supplementary material for: Survival of infants ≤24 months of age with brain tumors: A population-based study using the SEER database
Source: PLoS One. 2019 Sep 25;14(9):e0223051. doi: 10.1371/journal.pone.0223051 (PMC6760899; doi:10.1371/journal.pone.0223051)
Supplement: S5 Table — (XLSX) [file pone.0223051.s005.xlsx]

## Sheet: Sheet1
Comparing KM Survival within Each Tumor Subtype Based on Decade of Diagnosis	Omnibus Log-rank (Mantel-Cox) test p-value	Logrank test for trend
All Tumors	< 0.0001	< 0.0001
Choroid Plexus	0.9	0.75
Diffuse astrocytic and oligodendroglial	0.0002	0.0004
Embryonal	0.0249	0.0069
Ependymal	< 0.0001	<0.0001
Pilocytic astrocytoma	<0.0001	<0.0001
Medulloblastoma	0.0229	0.0019
Significance threshold	0.05
